# Supplementary material for: CoachMS, an innovative closed-loop, interdisciplinary platform to monitor and proactively treat MS symptoms: A pilot study
Source: PubMed Central journal article supplement — Mult Scler J Exp Transl Clin. 2021 Feb 2;7(1):2055217321988937. doi: 10.1177/2055217321988937 (PMC7970691; doi:10.1177/2055217321988937), 2021-02-02
Supplement: sj-pdf-1-mso-10.1177_2055217321988937.pdf [file sj-pdf-1-mso-10.1177_2055217321988937.pdf]

## **Supplementary - Appendix 2**

1. **Major Treatment Modalities for Bladder Dysfunction.**
2. **Major Treatment Modalities for Ambulation.**
3. **Major Treatment Modalities for Mood.**
4. **Literature Supporting Major Treatment Modalities When Considering Making Personalized Recommendations for Each BAM Symptom.**

# 1. Major Treatment Modalities for Bladder Dysfunction

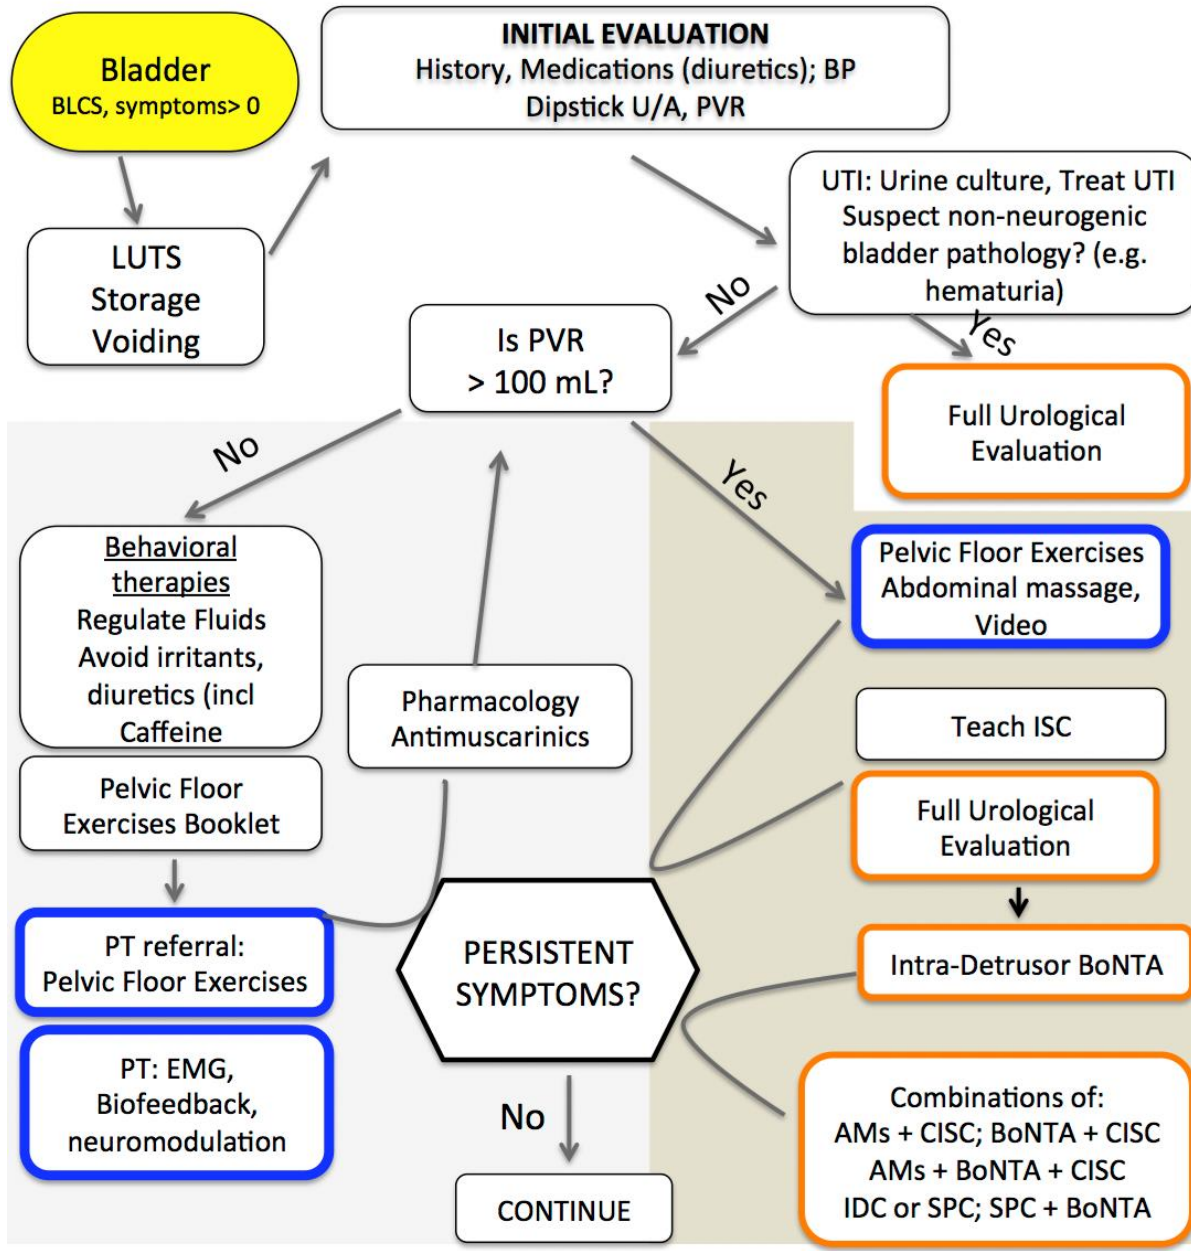

**Telephone Checklist**  
Correct data entry, Medication changes/doses, fever/pain, BP, fluid intake, bowel changes, MS relapse symptoms

**Interventions Checklist**  
CBC/U/A, Medication adjustment, PT referral, Urology referral

ABBREV: AMs=antimuscarinics; BP=blood pressure; CISC=C-intermittent self catheterization; DO=detrusor overactivity; IDC=indwelling catheter; LUTS: Lower Urinary Tract Symptoms; NoNT-A= botox; ; PVR=post void residual; SPC=suprapubic catheter

Adapted From:  
Seth et al, Curr Bladder Dysfunct Rep 2012; Phe et al, Nat Rev Urol 2016

## 2. Major Treatment Modalities for Ambulation

### AMBULATION EVALUATION

### STANDARD MS PT ASSESSMENT INCL. MOVEMENT PREFERENCES AND GOALS VIA MAM-CAT

MAM-CAT: Patients respond to 18 items related to 6 dimensions of movement: flexibility, strength, accuracy, speed, adaptability, and endurance. Patients mark how well they think they move now and how well they would like to be able to move (even if they had to work hard for it). The software calculates the *gaps* between current and preferred movement abilities on each of the 6 dimensions. A gap of 1+ level on any dimension =>trigger a PT assessment and potentially exercise prescription to address that (+/-related) movement dimension (Allen et al, *Qual Life Res* 2015)

Address movement dimensions, body parts, tasks of most concern to patient:

| Dimension    | Assessment                                                             | Intervention                                                         |
|--------------|------------------------------------------------------------------------|----------------------------------------------------------------------|
| flexibility  | Goniometric range of motion/ spasticity                                | Stretching/ positioning                                              |
| strength     | Dynamometry/ manual muscle test                                        | Targeted resistive exercise                                          |
| accuracy     | Coordination tests                                                     | Practice with feedback/ motor learning                               |
| speed        | Timed tasks                                                            | Time trials                                                          |
| adaptability | Balance perturbations/ obstacles/ changing environments; sensory tests | Practice correcting errors in progressively challenging environments |
| endurance    | Exertion with longer tasks; vital signs                                | Aerobic exercise                                                     |

Recommend as needed: Fampridine trial; Assistive devices; Home safety evaluation; Referrals: vision, other

### RECOMMENDED EXERCISE LEVEL FOR LEVEL OF DISABILITY

| Level of Disability                                                                    | EDSS | Training Program                                                                                                                                             | Modified from Heesen et al, <i>Expert Rev Neurotherapeutics</i> , 2006;6(3), 347-355. |
|----------------------------------------------------------------------------------------|------|--------------------------------------------------------------------------------------------------------------------------------------------------------------|---------------------------------------------------------------------------------------|
| None: No fatigue or thermosensitivity                                                  | 0    | Full exertion, aerobic and resistance exercise, no extreme sports                                                                                            |                                                                                       |
| Minimal: Limited fatigue and heat sensitivity; minor balance/ gait problems            | 1-2  | Monitored exercise program, including strengthening and endurance using a variety of exercise types; precooling if heat sensitive; avoidance of overtraining |                                                                                       |
| Moderate: Limited gait; may have spasticity, weakness, ataxia, balance problems        | 3-5  | Deficit-driven exercise protocols, including strengthening and endurance training using methods tolerated, walking, cycle ergometry, precooling if needed    |                                                                                       |
| Severe: Cannot participate in all daily activities; short-distance, aided walking only | 6-7  | Movement preservation, stretching, targeted strengthening needed for task-specific training                                                                  |                                                                                       |
| Wheelchair used exclusively                                                            | 8    | Exercise to maintain motion, task-specific training                                                                                                          |                                                                                       |
| Bedridden                                                                              | 9    | Primarily passive movements to maintain motion, breathing exercises                                                                                          |                                                                                       |

Telephone Checklist: Technical difficulties (FitBit battery, bracelet; password; wifi); Travel, Falls, pain, nocturia, vision, medication changes, light-headedness, MS relapse symptoms, fever/pain, fluid intake, changes in weather or environment

### 3. Major Treatment Modalities for Mood

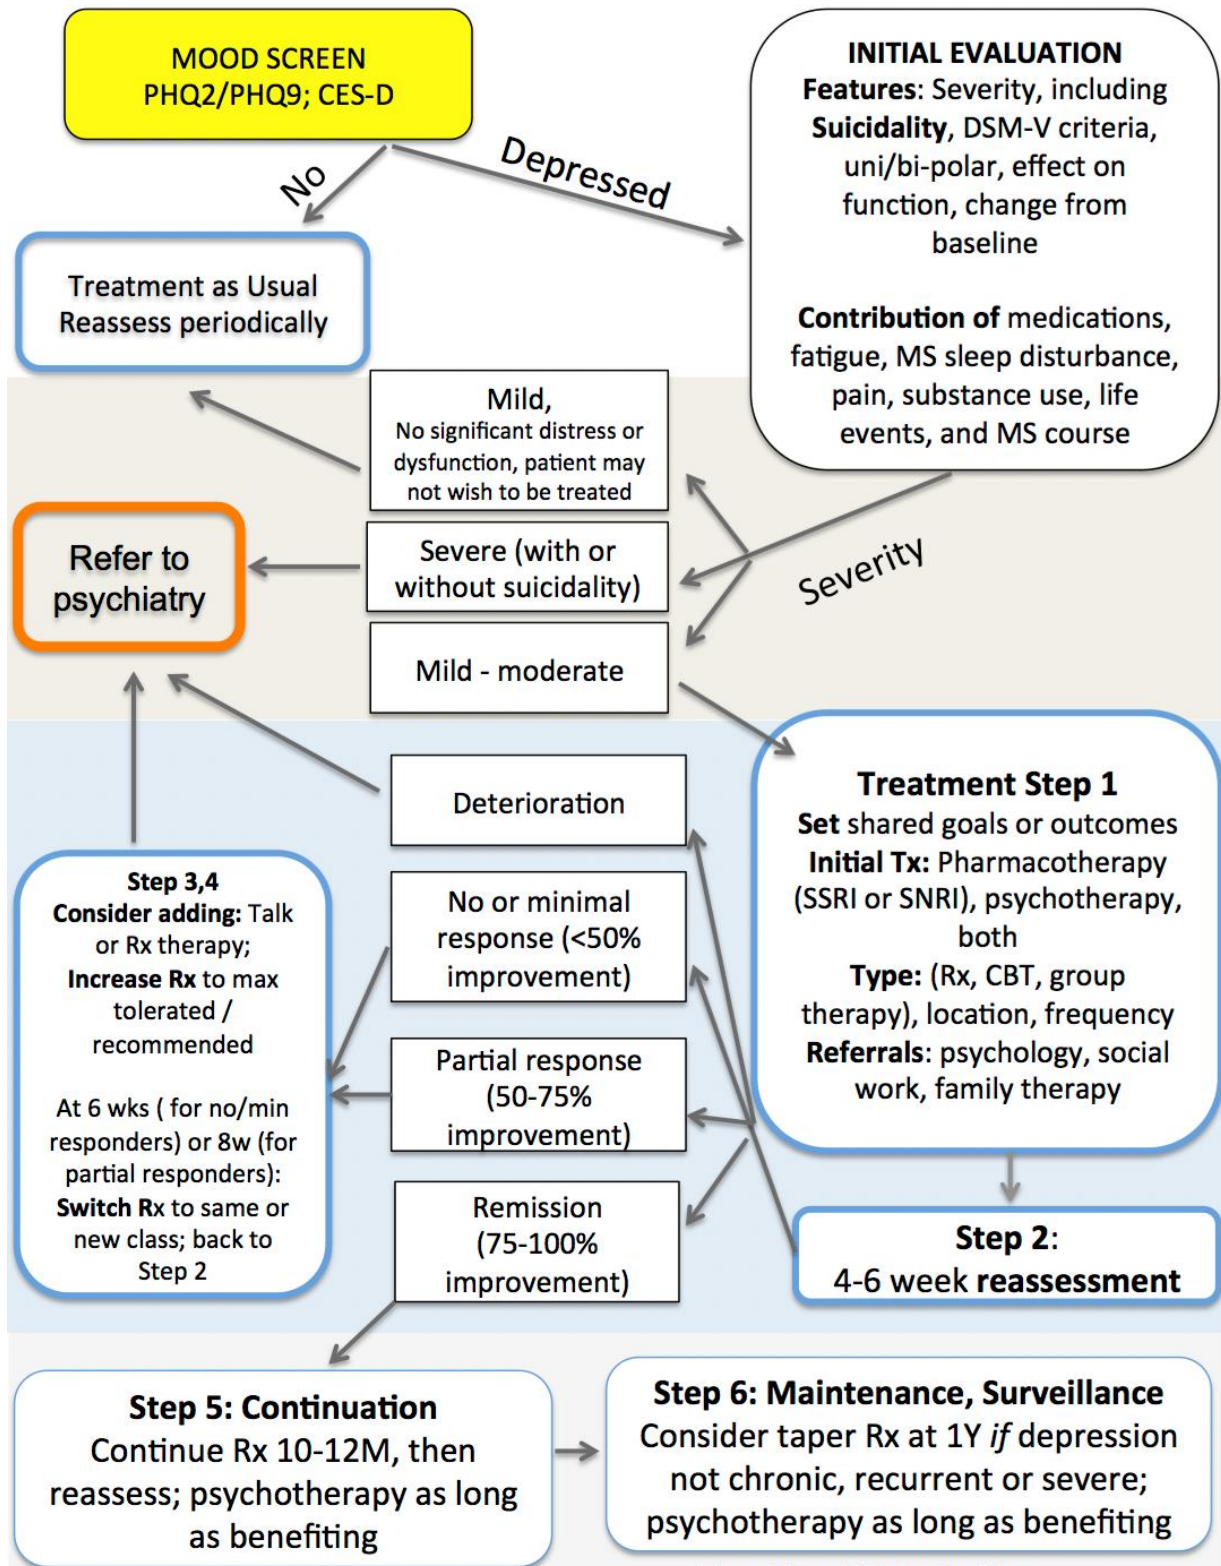

#### 4. Literature Supporting Major Treatment Modalities When Considering Making Personalized Recommendations for Each BAM Symptom.

##### **Bladder:**

Measurement and Treatment. Scales relate both to bladder function and quality of life (QOL).<sup>1</sup> Interventions in MS ranging from behavioral strategies,<sup>2</sup> physical therapy (PT),<sup>3,4,5</sup> nerve stimulation<sup>6</sup> and pharmacology have demonstrated efficacy in targeting bladder dysfunction;<sup>7-9</sup> including first-line stepwise management models (e.g. PT modalities for urinary incontinence [UI]:<sup>10</sup> electromyography (EMG) biofeedback, electrical stimulation and pelvic floor muscle training).<sup>5,7,11</sup> Improving UI can, in turn, reduce fatigue and depression, amplifying an effect on QOL.

Behavioral considerations. Motivation and adherence<sup>12</sup> have a strong association with improvements in bladder function.<sup>2,8</sup> Trials typically last 3-6 months and lack follow-up monitoring to measure sustained effects of therapies; however, one study of combination therapy for 9 weeks reported maintenance of reduced leakage episodes and adherence persisting until the end of the 24-week observation.<sup>8</sup>

##### **Ambulation:**

Measurement and Treatment. Remote monitoring of step count readily measures ambulation and has demonstrated associations with disability and QOL. **An 800 average daily step count** change has been suggested as clinically important.<sup>13</sup> Daily step count captures potentially actionable variability amongst persons within a specific EDSS category.<sup>14</sup> A range of interventions (e.g. endurance or resistance training, adapted yoga) have demonstrated efficacy in targeting individual contributors to ambulation (e.g. endurance, speed, strength, fall risk, balance), as assessed using traditional measures.<sup>15-30</sup> Systematic reviews suggest that exercise does improve walking speed and endurance.<sup>15</sup> Yet, exercise recommendations remain quite general,<sup>31</sup> reflecting the need for individualized goals and interventions. Walking speed and endurance can also improve with 4-aminopyridine pills.<sup>32,33</sup>

Behavioral considerations. Typical rehabilitation trials last only 8 weeks, with benefits that may only persist a few weeks beyond this.<sup>34</sup> Even pragmatic trials recognizing the need for sustained behavior change typically last only 12 weeks.<sup>35</sup> For this reason, recent approaches have included rehabilitation through telemedicine (with heterogeneous results<sup>36,37</sup>) and promotion of at-home activity.<sup>38</sup> Despite the importance of ambulation for general health and QOL, the *relatively low uptake of exercise by persons with MS* reflects in part unmet needs for education, on (i) the benefits and optimal frequency of exercise while avoiding falls/overexertion, (ii) materials on home and community exercise and (iii) tools for initiating and maintaining exercise behavior.<sup>39</sup> Physical therapists are increasingly called to partner with MS patients to address individual barriers to participation in community-based physical activity;<sup>40</sup> i.e., *to coach them*.

##### **Mood:**

Measurement and Treatment. A number of scales have been validated for assessment and monitoring of treatment of depression, and both psychological and pharmacological interventions have demonstrated effectiveness in controlled clinical trials of patients with MS.<sup>41</sup>

Behavioral considerations. Patients with MS and low socioeconomic status may disproportionately experience difficulty coping with their MS due to **difficulty navigating their clinical care**.<sup>42</sup> In addition, affordable psychotherapy and access to psychiatrists is challenging for people with non-specialty mental health needs, in MS<sup>43</sup> and more broadly.<sup>44</sup>

## REFERENCES

1. Harvey MA, Kristjansson B, Griffith D, Versi E. The Incontinence Impact Questionnaire and the Urogenital Distress Inventory: a revisit of their validity in women without a urodynamic diagnosis. *Am J Obstet Gynecol.* 2001;185(1):25-31.
2. Burgio K, Locher J, Goode P, et al. Behavioral vs drug treatment for urge urinary incontinence in older women: a randomized controlled trial. *JAMA.* 1998;280(23):1995-2000.
3. Dannecker C, Wolf V, Raab R, Hepp H, Anthuber C. EMG-biofeedback assisted pelvic floor muscle training is an effective therapy of stress urinary or mixed incontinence: a 7-year experience with 390 patients. *Arch Gynecol Obstet.* 2005;273(2):93-97.
4. Dumoulin C, Glazener C, Jenkinson D. Determining the optimal pelvic floor muscle training regimen for women with stress urinary incontinence. *Neurourol Urodyn.* 2011;30(5):746-753.
5. Block V, Rivera M, Melnick M, Allen DD. Do Physical Therapy Interventions Affect Urinary Incontinence and Quality of Life in People with Multiple Sclerosis?: An Evidence-Based Review. *Int J MS Care.* 2015;17(4):172-180.
6. de Seze M, Raibaut P, Gallien P, et al. Transcutaneous posterior tibial nerve stimulation for treatment of the overactive bladder syndrome in multiple sclerosis: results of a multicenter prospective study. *Neurourol Urodyn.* 2011;30(3):306-311.
7. McClurg D, Ashe RG, Marshall K, Lowe-Strong AS. Comparison of pelvic floor muscle training, electromyography biofeedback, and neuromuscular electrical stimulation for bladder dysfunction in people with multiple sclerosis: a randomized pilot study. *Neurourol Urodyn.* 2006;25(4):337-348.
8. McClurg D, Ashe RG, Lowe-Strong AS. Neuromuscular electrical stimulation and the treatment of lower urinary tract dysfunction in multiple sclerosis--a double blind, placebo controlled, randomised clinical trial. *Neurourol Urodyn.* 2008;27(3):231-237.
9. Vahtera T HM, Viramo-Koskela AL, Ruutiainen J. Pelvic floor rehabilitation is effective in patients with multiple sclerosis. *Clinical Rehabilitation.* 1997;11:211-219.
10. Panicker JN, Fowler CJ. Lower urinary tract dysfunction in patients with multiple sclerosis. *Handb Clin Neurol.* 2015;130:371-381.
11. Nicholas R, Rashid W. Multiple sclerosis. *Am Fam Physician.* 2013;87(10):712-714.
12. Doggweiler-Wiygul R, Sellhorn E. Role of behavioral changes and biofeedback in urology. *World J Urol.* 2002;20(5):302-305.
13. Motl RW, Pilutti LA, Learmonth YC, Goldman MD, Brown T. Clinical importance of steps taken per day among persons with multiple sclerosis. *PLoS One.* 2013;8(9):e73247.
14. Block V, A. L, Crabtree-Hartman E, et al. Lower Step Count Assessed Using Commercially Available Accelerometry (Fitbit) is Associated with MS Disability: The FITriMS Study. ECTRIMS; 2016; London, UK.
15. Pearson M, Dieberg G, Smart N. Exercise as a therapy for improvement of walking ability in adults with multiple sclerosis: a meta-analysis. *Arch Phys Med Rehabil.* 2015;96(7):1339-1348 e1337.

16. Hobart J, Blight AR, Goodman A, Lynn F, Putzki N. Timed 25-foot walk: direct evidence that improving 20% or greater is clinically meaningful in MS. *Neurology*. 2013;80(16):1509-1517.
17. de Oliveira G, Tavares MD, de Faria Oliveira JD, Rodrigues MR, Santaella DF. Yoga training has positive effects on postural balance and its influence on activities of daily living in people with multiple sclerosis: A pilot study. *Explore (NY)*. 2016.
18. Cramer H, Lauche R, Azizi H, Dobos G, Langhorst J. Yoga for multiple sclerosis: a systematic review and meta-analysis. *PLoS One*. 2014;9(11):e112414.
19. Cruickshank TM, Reyes AR, Ziman MR. A systematic review and meta-analysis of strength training in individuals with multiple sclerosis or Parkinson disease. *Medicine (Baltimore)*. 2015;94(4):e411.
20. Braendvik SM, Koret T, Helbostad JL, et al. Treadmill Training or Progressive Strength Training to Improve Walking in People with Multiple Sclerosis? A Randomized Parallel Group Trial. *Physiother Res Int*. 2015.
21. Deckx N, Wens I, Nuyts AH, et al. 12 Weeks of Combined Endurance and Resistance Training Reduces Innate Markers of Inflammation in a Randomized Controlled Clinical Trial in Patients with Multiple Sclerosis. *Mediators Inflamm*. 2016;2016:6789276.
22. Keller JL, Fritz N, Chiang CC, et al. Adapted Resistance Training Improves Strength in Eight Weeks in Individuals with Multiple Sclerosis. *J Vis Exp*. 2016(107):e53449.
23. Kjolhede T, Dalgas U, Gade AB, et al. Acute and chronic cytokine responses to resistance exercise and training in people with multiple sclerosis. *Scand J Med Sci Sports*. 2016;26(7):824-834.
24. Medina-Perez C, de Souza-Teixeira F, Fernandez-Gonzalo R, de Paz-Fernandez JA. Effects of a resistance training program and subsequent detraining on muscle strength and muscle power in multiple sclerosis patients. *NeuroRehabilitation*. 2014;34(3):523-530.
25. Medina-Perez C, de Souza-Teixeira F, Fernandez-Gonzalo R, Hernandez-Murua JA, Antonio de Paz-Fernandez J. Effects of high-speed power training on muscle strength and power in patients with multiple sclerosis. *J Rehabil Res Dev*. 2016;53(3):359-368.
26. Moradi M, Sahraian MA, Aghsaie A, et al. Effects of Eight-week Resistance Training Program in Men With Multiple Sclerosis. *Asian J Sports Med*. 2015;6(2):e22838.
27. Hobart JC, Riazi A, Lamping DL, Fitzpatrick R, Thompson AJ. Measuring the impact of MS on walking ability: the 12-Item MS Walking Scale (MSWS-12). *Neurology*. 2003;60(1):31-36.
28. McGuigan C, Hutchinson M. Confirming the validity and responsiveness of the Multiple Sclerosis Walking Scale-12 (MSWS-12). *Neurology*. 2004;62(11):2103-2105.
29. Motl RW. Lifestyle physical activity in persons with multiple sclerosis: the new kid on the MS block. *Multiple sclerosis*. 2014.
30. Motl RW, Putzki N, Pilutti LA, Cadavid D. Longitudinal changes in self-reported walking ability in multiple sclerosis. *PLoS One*. 2015;10(5):e0125002.
31. Garrett M, Hogan N, Larkin A, Saunders J, Jakeman P, Cote S. Exercise in the community for people with minimal gait impairment due to MS: an assessor-blind randomized controlled trial. *Mult Scler*. 2013;19(6):782-789.
32. Zorner B, Filli L, Reuter K, et al. Prolonged-release fampridine in multiple sclerosis: Improved ambulation effected by changes in walking pattern. *Mult Scler*. 2016.

33. Applebee A, Goodman AD, Mayadev AS, et al. Effects of Dalfampridine Extended-release Tablets on 6-minute Walk Distance in Patients With Multiple Sclerosis: A Post Hoc Analysis of a Double-blind, Placebo-controlled Trial. *Clin Ther.* 2015;37(12):2780-2787.
34. Wiles CM, Newcombe RG, Fuller KJ, et al. Controlled randomised crossover trial of the effects of physiotherapy on mobility in chronic multiple sclerosis. *J Neurol Neurosurg Psychiatry.* 2001;70(2):174-179.
35. Saxton JM, Carter A, Daley AJ, et al. Pragmatic exercise intervention for people with multiple sclerosis (ExIMS trial): study protocol for a randomised controlled trial. *Contemp Clin Trials.* 2013;34(2):205-211.
36. Amatya B, Galea MP, Kesselring J, Khan F. Effectiveness of telerehabilitation interventions in persons with multiple sclerosis: A systematic review. *Mult Scler Relat Disord.* 2015;4(4):358-369.
37. Khan F, Amatya B, Kesselring J, Galea M. Telerehabilitation for persons with multiple sclerosis. *Cochrane Database Syst Rev.* 2015(4):CD010508.
38. Thomas S, Fazakarley L, Thomas PW, et al. Testing the feasibility and acceptability of using the Nintendo Wii in the home to increase activity levels, vitality and well-being in people with multiple sclerosis (Mii-vitaliSe): protocol for a pilot randomised controlled study. *BMJ Open.* 2014;4(5):e005172.
39. Learmonth YC, Adamson BC, Balto JM, et al. Multiple sclerosis patients need and want information on exercise promotion from healthcare providers: a qualitative study. *Health Expect.* 2016.
40. Mulligan H, Treharne GJ, Hale LA, Smith C. Combining self-help and professional help to minimize barriers to physical activity in persons with multiple sclerosis: a trial of the "Blue Prescription" approach in New Zealand. *J Neurol Phys Ther.* 2013;37(2):51-57.
41. Fiest KM, Walker JR, Bernstein CN, et al. Systematic review and meta-analysis of interventions for depression and anxiety in persons with multiple sclerosis. *Mult Scler Relat Disord.* 2016;5:12-26.
42. Marrie RA, Horwitz R, Cutter G, Tyry T, Campagnolo D, Vollmer T. The burden of mental comorbidity in multiple sclerosis: frequent, underdiagnosed, and undertreated. *Mult Scler.* 2009;15(3):385-392.
43. Buchanan RJ, Schiffer R, Wang S, et al. Satisfaction with mental health care among people with multiple sclerosis in urban and rural areas. *Psychiatr Serv.* 2006;57(8):1206-1209.
44. Wang PS, Berglund P, Kessler RC. Recent care of common mental disorders in the United States : prevalence and conformance with evidence-based recommendations. *J Gen Intern Med.* 2000;15(5):284-292.
