# Supplementary material for: CoachMS, an innovative closed-loop, interdisciplinary platform to monitor and proactively treat MS symptoms: A pilot study
Source: PubMed Central journal article supplement — Mult Scler J Exp Transl Clin. 2021 Feb 2;7(1):2055217321988937. doi: 10.1177/2055217321988937 (PMC7970691; doi:10.1177/2055217321988937), 2021-02-02
Supplement: sj-pdf-2-mso-10.1177_2055217321988937.pdf [file sj-pdf-2-mso-10.1177_2055217321988937.pdf]

**Current Level of Independence**

|                      | Independent           | Supervision           | Minimal Assistance    | Moderate Assistance   | Maximal Assistance    | Dependent             |
|----------------------|-----------------------|-----------------------|-----------------------|-----------------------|-----------------------|-----------------------|
| Community Ambulation | <input type="radio"/> |
| Household Ambulation | <input type="radio"/> |
| Transfers            | <input type="radio"/> |
| ADLs                 | <input type="radio"/> |
| IADLs                | <input type="radio"/> |

Reported Ambulation Distance \_\_\_\_\_  
(meters)

Symptoms Provoked  Fatigue  Pain  Spasticity  
 Balance Deficits  Dizziness/Vertigo  
 Falls  Bladder

**Fatigue**

Severity 0 5 10  
  
 (Place a mark on the scale above)

Diurnal Variation  Yes  No

Aggravating or Easing Factors?  
 \_\_\_\_\_

Fatigue Notes  
 \_\_\_\_\_

**Balance Deficits**

Static Balance  Good  Fair  Poor

Dynamic Balance  Good  Fair  Poor

Balance Notes  
 \_\_\_\_\_

**Dizziness/Vertigo**

Vertigo Severity 0 5 10  
  
 (Place a mark on the scale above)

Dizziness Severity 0 5 10  
  
 (Place a mark on the scale above)

---

Vertigo Notes

---

---

**Falls**

---

Fall/near fall in the last week?

Yes  No

---

Number of falls in the last week

---

Number of near falls in the last week

---

Types of falls

Front  Back  Turning

---

Injuries due to falls

---

(Please describe)

## Hopkins Falls Grading Scale

## Hopkins Falls Grading Scale

1

**Grade 1- Near Fall**

- Slip, trip or loss of balance
- Did not fall to the ground or a lower level (e.g. chair)

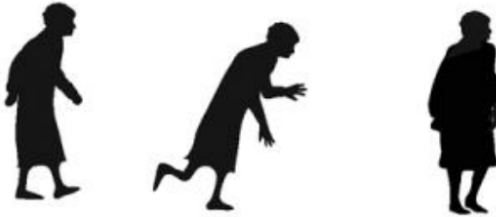

2

**Grade 2- Fall**

- Fell to the ground or a lower level (e.g. chair)
- Did not receive medical attention

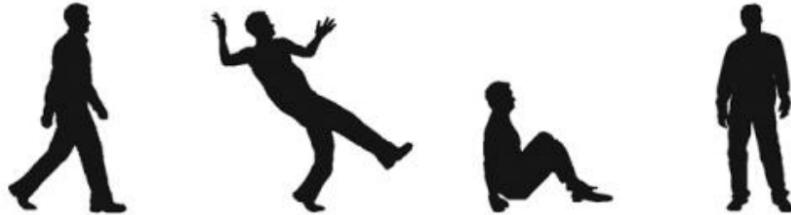

3

**Grade 3- Fall**

- Fell to the ground or a lower level (e.g. chair)
- Received medical attention, not admitted to the hospital

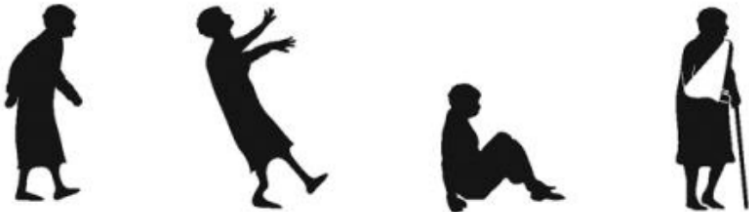

4

**Grade 4- Fall**

- Fell to the ground or a lower level (e.g. chair)
- Admitted to the hospital

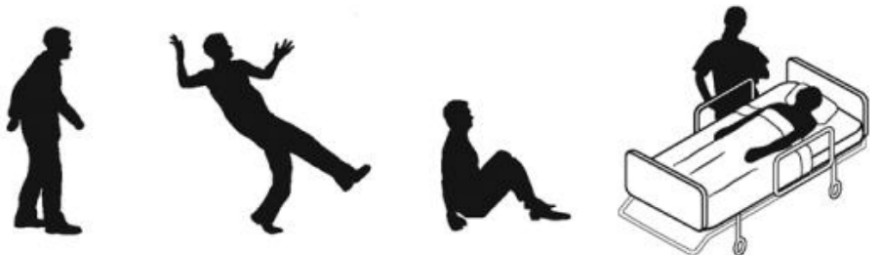

Hopkins Falls Grading Scale. © Johns Hopkins University

Hopkins Falls Grading Scale

- Grade 1- Near Fall  
 Grade 2 - Fall  
 Grade 3 - Fall, received medical attention  
 Grade 4 - Fall, admitted to hospital

Falls Notes

**Bladder - Incontinence**

Type  Stress  
 Urge  
 Functional

Frequency

\_\_\_\_\_ (number of times a day)

Nocturia

Yes  
 No

Other Subjective Notes?

\_\_\_\_\_

Current Treatment

\_\_\_\_\_

Recommendations

\_\_\_\_\_

**Social/Vocation/Recreation**

Living Environment

Home  
 Apartment/Condo  
 Assisted Living  
 Other

Stairs

\_\_\_\_\_

Coinhabitants

\_\_\_\_\_

Receiving assistance at home?

Yes  
 No

Recreational facility availability

Gym  
 Pool  
 Mall  
 Street  
 Hiking Trails

Accessibility Notes

\_\_\_\_\_ (public, private, ADA accessible)

Physical Therapy Treatment

Past  
 Present  
 Never

Past/present PT

- Neuro PT  
 Pelvic PT  
 Ortho/general PT

Physical Therapy Recommendations

### Patient Information

Patient Goals

Handedness

- Right    Left    Ambidextrous

Placement of Fitbit

- Right  
 Left  
 (see MMT section if placement of Fitbit is on weaker side)

Fitbit STEPS Goal

### 2 Minute Walk Test

Distance walked in 2 minutes

Assistive Device for 2MWT

- none  
 cane/ crutch on R side  
 cane/ crutch on L side  
 2 canes  
 walker  
 needs another person to assist

Gait Observation Notes

### Gait Speed

**Record only the times for the two successfully completed trials of the Timed 25-Foot Walk. If the patient could not complete one or both of the trials of the Timed 25-Foot Walk, record this in the appropriate section of the Record Form. For example, if the patient's disease has progressed and/or physical limitations prohibit him or her from completing the trial, you should indicate "Unable to complete trial due to physical limitations", and record any specifics that you can observe (i.e., patient in a wheelchair now and unable to walk, etc.).**

**If the patient did not complete a trial for any other reason, specify this as well (e.g., patient fell and was too fatigued to complete another trial; patient refused to complete trial).**

T25FW Trial 1

T25FW Trial 2

\_\_\_\_\_

T25FW Average

\_\_\_\_\_

Assistive Device for T25FW

- none
- cane/ crutch on R side
- cane/ crutch on L side
- 2 canes
- walker
- needs another person to assist

T25FW Notes

\_\_\_\_\_

TUG Trial 1

\_\_\_\_\_

TUG Trial 2

\_\_\_\_\_

TUG Average

\_\_\_\_\_

Gait Speed Notes

\_\_\_\_\_

**Romberg Test**

Eyes Open (firm)

\_\_\_\_\_

Eyes Closed (firm)

\_\_\_\_\_

Eyes Open (foam)

\_\_\_\_\_

Eyes Closed (foam)

\_\_\_\_\_

Romberg Test Notes

\_\_\_\_\_

Balance Outcome Measure

- MiniBEST    Berg Balance Scale

**MiniBEST**

|                                                   |                                                                                                                                                                                                                                                                                                                             |
|---------------------------------------------------|-----------------------------------------------------------------------------------------------------------------------------------------------------------------------------------------------------------------------------------------------------------------------------------------------------------------------------|
| Sit to stand                                      | <input type="radio"/> 2 Normal: Comes to stand without use of hands and stabilizes independently.<br><input type="radio"/> 1 Moderate: Comes to stand WITH use of hands on first attempt.<br><input type="radio"/> 0 Severe: Unable to stand up from chair without assistance, OR needs several attempts with use of hands. |
| Rise to toes                                      | <input type="radio"/> 2 Normal: Stable for 3 s with maximum height. <input type="radio"/> 1 Moderate: Heels up, but not full range (smaller than when holding hands), OR noticeable instability for 3 s.<br><input type="radio"/> 0 Severe: < 3 s.                                                                          |
| Stand on one leg (L)                              | <input type="radio"/> 2 Normal: 20 s. <input type="radio"/> 1 Moderate: < 20 s.<br><input type="radio"/> 0 Severe: Unable.                                                                                                                                                                                                  |
| Stand on one leg (R)                              | <input type="radio"/> 2 Normal: 20 s. <input type="radio"/> 1 Moderate: < 20 s.<br><input type="radio"/> 0 Severe: Unable.                                                                                                                                                                                                  |
| Compensatory Stepping Correction- Forward         | <input type="radio"/> 2 Normal: Recovers independently with a single, large step (second realignment step is allowed). <input type="radio"/> 1 Moderate: More than one step used to recover equilibrium.<br><input type="radio"/> 0 Severe: No step, OR would fall if not caught, OR falls spontaneously.                   |
| Compensatory Stepping Correction- Backward        | <input type="radio"/> 2 Normal: Recovers independently with a single, large step. <input type="radio"/> 1 Moderate: More than one step used to recover equilibrium.<br><input type="radio"/> 0 Severe: No step, OR would fall if not caught, OR falls spontaneously.                                                        |
| Compensatory Stepping Correction- Lateral (L)     | <input type="radio"/> 2 Normal: Recovers independently with 1 step (crossover or lateral OK).<br><input type="radio"/> 1 Moderate: Several steps to recover equilibrium. <input type="radio"/> 0 Severe: Falls, or cannot step.                                                                                             |
| Compensatory Stepping Correction- Lateral (R)     | <input type="radio"/> 2 Normal: Recovers independently with 1 step(crossover or lateral OK).<br><input type="radio"/> 1 Moderate: Several steps to recover equilibrium. <input type="radio"/> 0 Severe: Falls, or cannot step.                                                                                              |
| Stance (feet together); eyes open, firm surface   | <input type="radio"/> 2 Normal: 30 s. <input type="radio"/> 1 Moderate: < 30 s.<br><input type="radio"/> 0 Severe: Unable.                                                                                                                                                                                                  |
| Stance (feet together); eyes closed, foam surface | <input type="radio"/> 2 Normal: 30 s. <input type="radio"/> 1 Moderate: < 30 s.<br><input type="radio"/> 0 Severe: Unable.                                                                                                                                                                                                  |
| Incline eyes closed                               | <input type="radio"/> 2 Normal: Stands independently 30 s and aligns with gravity. <input type="radio"/> 1 Moderate: Stands independently < 30 s OR aligns with surface.<br><input type="radio"/> 0 Severe: Unable.                                                                                                         |



Change in gait speed

2 Normal: Significantly changes walking speed without imbalance.

1 Moderate: Unable to change walking speed or signs of imbalance.  0 Severe: Unable to achieve significant change in walking speed AND signs of imbalance.

Walk with head turns- horizontal

2 Normal: Turns with feet close FAST (< 3 steps) with good balance.

1 Moderate: Turns with feet close SLOW (>4 steps) with good balance.

0 Severe: Cannot turn with feet close at any speed without imbalance.

Step over obstacles

2 Normal: Able to step over box with minimal change of gait speed and with good balance.  1 Moderate: Steps over box but touches box OR displays cautious behavior by slowing gait.  0 Severe: Unable to step over box OR steps around box.

TUG & Dual Task

\_\_\_\_\_

(seconds)

TUG average

\_\_\_\_\_

10% increase from TUG average (if TUG Dual Task is higher than this value, score 1)

\_\_\_\_\_

TUG & Dual Task

2 Normal: No noticeable change in sitting, standing or walking while backward counting when compared to TUG without Dual Task.

1 Moderate: Dual Task affects either counting OR walking (>10%) when compared to the TUG without Dual Task.

0 Severe: Stops counting while walking OR stops walking while counting.

MiniBEST Score

\_\_\_\_\_

### Berg Balance Scale

Sit to stand

4 able to stand without using hands and stabilize independently

3 able to stand independently using hands

2 able to stand using hands after several tries

1 needs minimal aid to stand or stabilize

0 needs moderate or maximal assist to stand

Standing unsupported

4 able to stand safely for 2 minutes

3 able to stand 2 minutes with supervision

2 able to stand 30 seconds unsupported

1 needs several tries to stand 30 seconds unsupported

0 unable to stand 30 seconds unsupported

|                                                              |                                                                                                                                                                                                                                                                                                                                                                                                                                                                                                            |
|--------------------------------------------------------------|------------------------------------------------------------------------------------------------------------------------------------------------------------------------------------------------------------------------------------------------------------------------------------------------------------------------------------------------------------------------------------------------------------------------------------------------------------------------------------------------------------|
| Sitting with back unsupported but feet supported             | <input type="radio"/> 4 sits safely with minimal use of hands<br><input type="radio"/> 3 controls descent by using hands<br><input type="radio"/> 2 uses back of legs against chair to control descent<br><input type="radio"/> 1 sits independently but has uncontrolled descent<br><input type="radio"/> 0 needs assist to sit                                                                                                                                                                           |
| Transfers                                                    | <input type="radio"/> 4 able to transfer safely with minor use of hands<br><input type="radio"/> 3 able to transfer safely definite need of hands<br><input type="radio"/> 2 able to transfer with verbal cuing and/or supervision<br><input type="radio"/> 1 needs one person to assist<br><input type="radio"/> 0 needs two people to assist or supervise to be safe                                                                                                                                     |
| Standing unsupported with eyes closed                        | <input type="radio"/> 4 able to stand 10 seconds safely<br><input type="radio"/> 3 able to stand 10 seconds with supervision<br><input type="radio"/> 2 able to stand 3 seconds<br><input type="radio"/> 1 unable to keep eyes closed 3 seconds but stays safely<br><input type="radio"/> 0 needs help to keep from falling                                                                                                                                                                                |
| Standing unsupported with feet together                      | <input type="radio"/> 4 able to place feet together independently and stand 1 minute safely<br><input type="radio"/> 3 able to place feet together independently and stand 1 minute with supervision<br><input type="radio"/> 2 able to place feet together independently but unable to hold for 30 seconds<br><input type="radio"/> 1 needs help to attain position but able to stand 15 seconds feet together<br><input type="radio"/> 0 needs help to attain position and unable to hold for 15 seconds |
| Reaching forward with outstretched arm while standing        | <input type="radio"/> 4 can reach forward confidently 25 cm (10 inches)<br><input type="radio"/> 3 can reach forward 12 cm (5 inches)<br><input type="radio"/> 2 can reach forward 5 cm (2 inches)<br><input type="radio"/> 1 reaches forward but needs supervision<br><input type="radio"/> 0 loses balance while trying/requires external support                                                                                                                                                        |
| Pick up object from floor from standing position             | <input type="radio"/> 4 able to pick up slipper safely and easily<br><input type="radio"/> 3 able to pick up slipper but needs supervision<br><input type="radio"/> 2 unable to pick up but reaches 2-5 cm(1-2 inches) from slipper and keeps balance independently<br><input type="radio"/> 1 unable to pick up and needs supervision while trying<br><input type="radio"/> 0 unable to try/needs assist to keep from losing balance or falling                                                           |
| Turning to look over left and right shoulders while standing | <input type="radio"/> 4 looks behind from both sides and weight shifts well<br><input type="radio"/> 3 looks behind one side only other side shows less weight shift<br><input type="radio"/> 2 turns sideways only but maintains balance<br><input type="radio"/> 1 needs supervision when turning<br><input type="radio"/> 0 needs assist to keep from losing balance or falling                                                                                                                         |

Turn 360 degrees

- 4 able to turn 360 degrees safely in 4 seconds or less
- 3 able to turn 360 degrees safely one side only 4 seconds or less
- 2 able to turn 360 degrees safely but slowly
- 1 needs close supervision or verbal cuing
- 0 needs assistance while turning

Place alternate foot on step while standing unsupported

- 4 able to stand independently and safely and complete 8 steps in 20 seconds
- 3 able to stand independently and complete 8 steps in > 20 seconds
- 2 able to complete 4 steps without aid with supervision
- 1 able to complete > 2 steps needs minimal assist
- 0 needs assistance to keep from falling/unable to try

Standing unsupported one foot in front

- 4 able to place foot tandem independently and hold 30 seconds
- 3 able to place foot ahead independently and hold 30 seconds
- 2 able to take small step independently and hold 30 seconds
- 1 needs help to step but can hold 15 seconds
- 0 loses balance while stepping or standing

Standing on one leg

- 4 able to lift leg independently and hold > 10 seconds
- 3 able to lift leg independently and hold 5-10 seconds
- 2 able to lift leg independently and hold ≥ 3 seconds
- 1 tries to lift leg unable to hold 3 seconds but remains standing independently.
- 0 unable to try of needs assist to prevent fall

Berg Balance Scale Score

\_\_\_\_\_

**Range of Motion and MMT**

Mobility Limitations (patient reported)

\_\_\_\_\_

Passive ROM UE

\_\_\_\_\_

Passive ROM LE

\_\_\_\_\_

Active ROM UE

\_\_\_\_\_

---

Active ROM LE

---

---

MMT UE

---

---

MMT LE

---

---

Coordination examination (FTN, HTS)

---
