# Supplementary material for: CoachMS, an innovative closed-loop, interdisciplinary platform to monitor and proactively treat MS symptoms: A pilot study
Source: PubMed Central journal article supplement — Mult Scler J Exp Transl Clin. 2021 Feb 2;7(1):2055217321988937. doi: 10.1177/2055217321988937 (PMC7970691; doi:10.1177/2055217321988937), 2021-02-02
Supplement: sj-pdf-3-mso-10.1177_2055217321988937.pdf [file sj-pdf-3-mso-10.1177_2055217321988937.pdf]

**Supplementary Table 2. Average Daily Step Count (STEPS) Goal Attainment per Group**

| Group   | Participant ID | Baseline STEPS (week 1 and 2) | STEPS Goal | Total Weeks STEPS Goal Met | Total Weeks of STEPS | Percentage of Weeks Mean STEPS Goal Met | Mean Percentage of Weeks Mean STEPS Goal Met | p-value |
|---------|----------------|-------------------------------|------------|----------------------------|----------------------|-----------------------------------------|----------------------------------------------|---------|
| CoachMS | 3              | 10853                         | 10000      | 13                         | 17                   | 76.5%                                   | 43.0%                                        | 0.409   |
|         | 4              | 6724                          | 6000       | 13                         | 17                   | 76.5%                                   |                                              |         |
|         | 6              | 635                           | 3500       | 2                          | 3                    | 66.7%                                   |                                              |         |
|         | 7              | 9427                          | 10000      | 9                          | 17                   | 52.9%                                   |                                              |         |
|         | 10             | 5820                          | 6500       | 3                          | 17                   | 17.6%                                   |                                              |         |
|         | 12             | 5250                          | 7500       | 0                          | 6                    | 0.0%                                    |                                              |         |
|         | 16             | 3233                          | 6000       | 1                          | 16                   | 6.3%                                    |                                              |         |
|         | 19             | 10131                         | 10000      | 2                          | 17                   | 11.8%                                   |                                              |         |
|         | 21             | 3160                          | 5000       | 5                          | 11                   | 45.5%                                   |                                              |         |
|         | 22             | 2083                          | 2500       | 5                          | 17                   | 29.4%                                   |                                              |         |
| 25      | 6031           | 3500                          | 13         | 14                         | 92.9%                |                                         |                                              |         |
| Control | 2              | 2359                          | 4000       | 0                          | 22                   | 0.0%                                    | 47.0%                                        | 0.409   |
|         | 8              | 3178                          | 2800       | 10                         | 17                   | 58.8%                                   |                                              |         |
|         | 15             | 4314                          | 6200       | 9                          | 13                   | 69.2%                                   |                                              |         |
|         | 17             | 1908                          | 6200       | 1                          | 17                   | 5.9%                                    |                                              |         |
|         | 18             | 7363                          | 10000      | 0                          | 7                    | 0.0%                                    |                                              |         |
|         | 20             | 3116                          | 6000       | 9                          | 17                   | 52.9%                                   |                                              |         |
|         | 23             | 12035                         | 14000      | 13                         | 17                   | 76.5%                                   |                                              |         |
|         | 24             | 2552                          | 2500       | 11                         | 14                   | 78.6%                                   |                                              |         |
|         | 26             | 9712                          | 6000       | 14                         | 18                   | 77.8%                                   |                                              |         |

**Legend:** STEPS: average step count; Total Weeks STEPS Goal Met: total number of weeks participant met step goal set at 2 week check in; Total Weeks of STEPS: total number of weeks participant produced valid STEPS data (3 days of valid STEPS [128 steps/day]); Percentage of Weeks Mean STEPS Goal Met: weeks step goal met out of total weeks of valid steps; Mean Percentage of Weeks STEPS Goal Met: mean percentage of percentage step goal met for each group
