# Supplementary material for: CoachMS, an innovative closed-loop, interdisciplinary platform to monitor and proactively treat MS symptoms: A pilot study
Source: PubMed Central journal article supplement — Mult Scler J Exp Transl Clin. 2021 Feb 2;7(1):2055217321988937. doi: 10.1177/2055217321988937 (PMC7970691; doi:10.1177/2055217321988937), 2021-02-02
Supplement: sj-pdf-4-mso-10.1177_2055217321988937.pdf [file sj-pdf-4-mso-10.1177_2055217321988937.pdf]

**Supplementary Table S1.**  
**Summary of Study Assessments**

| <b>A. Major Elements of the Physical Therapy Evaluation</b>         |                                                                                                                           |
|---------------------------------------------------------------------|---------------------------------------------------------------------------------------------------------------------------|
| <b>Gait Quality</b>                                                 | Subjectively examined by a trained physical therapist                                                                     |
| <b>Balance</b>                                                      | Berg Balance Scale (BBS) <sup>1</sup><br>or Mini Balance Evaluation Systems Test (Mini-BEST) <sup>1</sup>                 |
| <b>Strength</b>                                                     | Via manual muscle testing [MMT] <sup>2</sup>                                                                              |
| <b>Flexibility</b>                                                  | Via range of motion;<br>- together with MMT this ensured that appropriate and feasible physical recommendations were made |
| <b>Walking Speed</b>                                                | Timed 25-Foot Walk (T25FW) <sup>3</sup>                                                                                   |
| <b>Endurance</b>                                                    | 2-minute walk test (2MWT) <sup>4, 5</sup>                                                                                 |
| <b>Functional mobility</b>                                          | Timed-up and go (TUG) <sup>6</sup>                                                                                        |
| <b>B. Questionnaires Administered at Baseline, 6 &amp; 12 Weeks</b> |                                                                                                                           |
| <b>Questionnaire (Acronym)</b>                                      | <b>Domain / Use</b>                                                                                                       |
| <b>12-Item MS Walking Scale (MSWS-12)</b>                           | How MS has affected walking ability in the past 4 weeks                                                                   |
| <b>5-Item Modified Fatigue Index (MFIS-5)</b>                       | Assessment of mental and physical fatigue                                                                                 |
| <b>5-Item Mental Health Inventory (MHI-5)</b>                       | Assessment of mental health (depression and anxiety)                                                                      |
| <b>Pain Effects Scale (PES)</b>                                     | Assessment of pain                                                                                                        |
| <b>Bladder Control Scale (BLCS)</b>                                 | Impact of bladder dysfunction and control issues                                                                          |
| <b>Bowel Control Scale (BWCS)</b>                                   | Impact of bowel dysfunction and control issues                                                                            |
| <b>WHO Disability Assessment Schedule (WHODAS 2.0)</b>              | General quality of life assessment                                                                                        |
| <b>Center for Epidemiological Studies-Depression (CES-D)</b>        | Assessment of depression                                                                                                  |
| <b>MS Quality of Life-54 (MSQOL-54)</b>                             | MS specific quality of life assessment                                                                                    |

**Legend:** MS = multiple sclerosis
